# Supplementary material
Source: PubMed Central journal article supplement (PMC6380945)
Supplement: NIHMS1516900-supplement-3.pdf [file NIHMS1516900-supplement-3.pdf]

**Supplementary Table 1.** Crystallographic data collection and refinement statistics.

|                                                         |                       |
|---------------------------------------------------------|-----------------------|
| Protein                                                 | 441D6 Fab             |
| <b>PDB accession code</b>                               | 5TR8                  |
| <b>Data collection</b>                                  |                       |
| Space group                                             | C2                    |
| Cell constants                                          |                       |
| <i>a</i> , <i>b</i> , <i>c</i> (Å)                      | 98.5, 83.3, 83.2      |
| <i>a</i> , <i>b</i> , <i>g</i> (°)                      | 90.0, 105.7, 90.0     |
| Wavelength (Å)                                          | 1.00                  |
| Resolution (Å)                                          | 50.0-2.0 (2.07-2.00)  |
| <i>R</i> <sub>merge</sub>                               | 11.6 (73.1)           |
| <i>I</i> / <i>sI</i>                                    | 7.6 (1.5)             |
| Completeness (%)                                        | 98.5 (94.4)           |
| Redundancy                                              | 3.1 (2.3)             |
| <b>Refinement</b>                                       |                       |
| Resolution (Å)                                          | 24.6-2.01 (2.06-2.01) |
| Unique reflections                                      | 41926 (2138)          |
| <i>R</i> <sub>work</sub> / <i>R</i> <sub>free</sub> (%) | 17.8/19.9             |
| No. atoms                                               |                       |
| Protein                                                 | 3330                  |
| Ligand/ion                                              | 10                    |
| Water                                                   | 237                   |
| <i>B</i> -factors (Å <sup>2</sup> )                     |                       |
| Protein                                                 | 52.2                  |
| Ligand/ion                                              | 68.0                  |
| Water                                                   | 58.1                  |
| R.m.s. deviations                                       |                       |
| Bond lengths (Å)                                        | 0.007                 |
| Bond angles (°)                                         | 1.011                 |
| Ramachandran                                            |                       |
| Most favored regions (%)                                | 97.4                  |
| Additional allowed regions (%)                          | 2.6                   |
| Disallowed regions (%)                                  | 0.0                   |

Values in parentheses are for highest-resolution shell. The structure has been deposited in the PDB.
